# Supplementary material
Source: Elsevier journal article supplement (https://www.sciencedirect.com/science/article/pii/S0301054618301125)
Supplement: mmc1 [file S0301054618301125:mmc1.docx]

**Table E1 - Features of egg FPIES episodes**

|  | **1st EPISODE** | **2nd EPISODE** | **3rd EPISODE** |
| --- | --- | --- | --- |
| **Patients (n°)** | 61/61 | 51/61 | 20/61 |
| mean  **Age at the episode (months)** SD  95% CI  min - max | 9.8  3.8  8.85 - 10.75  6 - 26 | 10.9  4.4  9.8 - 12  6 -27 | 12  10  7.62 - 16.4  8 - 36 |
| Raw egg  Soft boiled egg  Fried omelette  **Egg doneness** Hard boiled egg  (n° patients) Baked egg withouth wheat matrix  Baked egg in wheat matrix  Raw egg in boiling broth | 7  8  5  14  1  1  25 | 5  8  5  11  2  3  17 | 1  5  1  4  2  3  4 |
| Whole egg  Half an egg  **Egg amount** 2 teaspoons  (n° patients) 1 teaspoon  Only yolk  DNA | 14  5  12  10  17  3 | 10  8  7  9  14  3 | 6  0  2  7  5  / |
| Mean  **Symptoms latency** SD  **(hours)** 95% CI  min **-** max | 2.25  1.06  1.98 – 2.52  1 - 8 | 2.3  1.1  1.2 – 2.6  6 - 8 | 1.9  0.69  1.58 – 2.22  1 - 3 |
| Mean  **Number of vomits** SD  95% CI  min - max | 4.3  3.2  3.47 – 5.13  1 - 12 | 4.2  2.7  3.53 – 4.97  0 - 10 | 5  3.5  3.38 – 6.62  1 - 15 |
| Yes  **Hypotension** No  (n° patients) DNA | 12  46  3 | 5  41  5 | 4  14  2 |
| Yes  **Pallor** No  (n° patients) DNA | 35  20  6 | 34  17  / | 15  7  / |
| Yes  **Lethargy** No  (n° patients) DNA | 42  19  / | 32  19  / | 13  9  / |
| Yes  **Hypotermia** No  (n° patients) DNA | 4  57  / | 0  51  / | 2  18  / |
| Yes  **Diarrhea** No  (n° patients) DNA | 8  53  / | 13  34  / | 6  14  / |
| Mild  **Judgement of severity** Moderate  (n° patients)  Severe  DNA | 22  30  6  3 | 21  24  6  1 | 9  7  3  1 |
| Mean  **Time of resolution** SD  (hours)95% CI  min - max | 4.7  6.6  3 – 6.35  0.5 - 48 | 5.4  7.4  3.5 – 7.4  0.5 - 48 | 4.8  3.9  3 – 6.6  0.5 - 12 |
| **Hospital admission** Yes  (n° patients) No | 5  56 | 4  47 | 3  17 |
| None  Oral/IV fluids  **Treatment** Oral/IM/IV ondansetron  (n° patients) Oral/IM/IV steroids  IM/IV adrenaline  DNA | 38  1/8  0/0/0  2/0/0  0/0  13 | 30  1/6  0/0/0  0/0/4  0/0  13 | 13  1/2  0/0/0  0/0/1  0/0  4 |

Legend: DNA = date not available; IV = intravenous; IM = intramuscular

**Table E2 - Features of OFC performed to check the eventual tolerance acquisition**

|  | **1st TOLERANCE OFC** | **2nd TOLERANCE OFC** | **3rd TOLERANCE OFC** |
| --- | --- | --- | --- |
| **Patients (n°)** | 39/61 | 11/61 | 4/61 |
| **OFC outcome** Passed  (n° patients) Failed | 23  16 | 7  4 | 2  2 |
| mean  **Age** (months) SD  95% CI  min - max | 30.7  20.5  23.91 - 7.49  13 - 120 | 35.3  15.3  26.3 - 44.3  14 - 75 | 58.5  17.9  41.3 – 76.3  46 - 84 |
| mean  **Distance from last FPIES** SD  (months) 95% CI  min - max | 17.2  15  12.24 - 22.16  1 - 84 | 17.3  13.5  9.32 - 25.28  6 - 51 | 31.5  15.3  16.5 - 46.5  9 - 43 |
| Raw egg  Soft boiled egg  Fried omelette  **Egg doneness** Hard boiled egg  (n° patients) Baked egg withouth wheat matrix  Baked egg in wheat matrix  Raw egg in boiling broth | 21  2  4  4  3  3  1 | 8  0  0  0  0  2  1 | 3  0  0  0  0  1  0 |
| According to current guidelines  **OFC method** 1/2 egg in single dose  (n° patients) DNA | 34  2  3 | 8  3  0 | 2  2  0 |
| Whole egg  Half an egg  **Egg amount** 2 teaspoons  (n° patients) 1 teaspoon  Only yolk  DNA | 20  12  3  2  1  1 | 1  9  0  1  0  0 | 2  2  0  0  0  0 |
| mean  **Symptoms latency** SD  (hours) 95% CI  min - max | 2  0.7  1.7 - 2.3  1- 3 | 2.7  1.7  1.1 - 4.4  1- 5 | 2.5  0.7  Not computable  2 - 3 |
| mean  **Number of vomits** SD  95% CI  min - max | 3.3  1.5  2.8 - 3.8  1 - 6 | 3.3  2.6  1.8 - 4.8  1 - 7 | 8  7  1.1 – 14.9  1 - 13 |
| Yes  **Hypotension** No  (n° patients) DNA | 3  13  0 | 0  4  0 | 0  2  0 |
| Yes  **Pallor** No  (n° patients) DNA | 11  5  0 | 3  1  0 | 1  1  0 |
| Yes  **Lethargy** No  (n° patients) DNA | 5  11  0 | 0  4  0 | 0  2  0 |
| Yes  **Hypotermia** No  (n° patients) DNA | 1  15  0 | 0  4  0 | 0  2  0 |
| Yes  **Diarrhea** No  (n° patients) DNA | 2  14  0 | 0  4  0 | 1  1  0 |
| Mild  **Judgement of severity** Moderate  (n° patients) Severe | 6  7  3 | 2  2  0 | 0  2  0 |
| mean  **Time of resolution**  SD  (hours) 95% CI  min - max | 4.7  3.4  3.6 - 5.8  0.5 - 12 | 2.1  1.3  1.3 – 2.9  1 - 4 | 3  1.4  1.7 – 4.3  2 - 4 |
| **ECG** performed  (n° patients) not performed | 6  33 | 0  0 | 0  0 |
| **Laboratory tests (n°)** performed  (n° patients) not performed | 9  7 | 1  0 | 0  0 |
| **Hospital admission** yes  (n° patients) no | 7  9 | 0  0 | 0  0 |
| None  Oral/IV fluids  **Treatment** Oral/IM/IV ondansetron  (n° patients) Oral/IM/IV steroids  IM adrenalina | 1  0/10  1/3/1  1/2/6  1 | 0  0/1  0/2/0  1/0/1  0/0 | 0  0/0  0/1/0  0/0/0  0/0 |

Legend: DNA = date not available; IV = intravenous; IM = intramuscular
